# Supplementary material for: Divergent activities of osteogenic BMP2, and tenogenic BMP12 and BMP13 independent of receptor binding affinities
Source: PubMed Central journal article supplement (PMC3154542; doi:10.3109/08977194.2011.593178), 2011-06-27

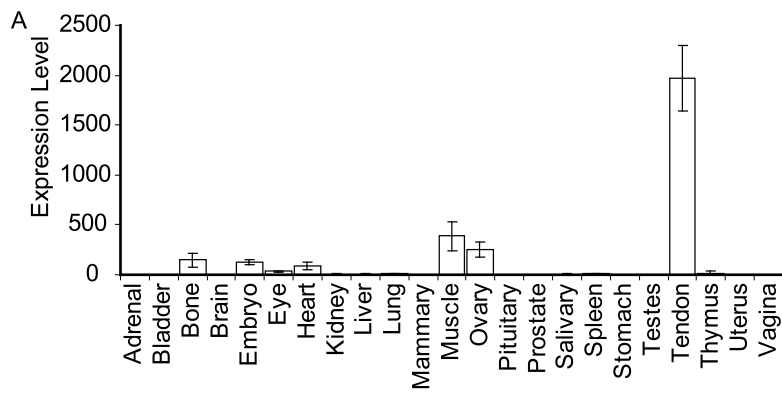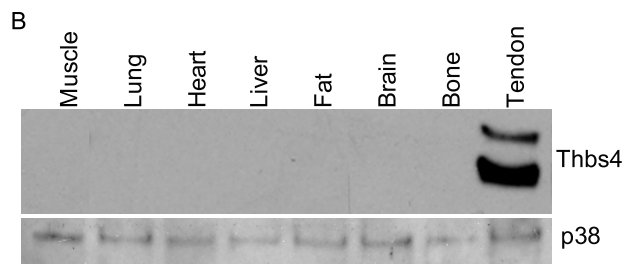

Supplement: SD1.pdf [file SD1.pdf]
