# Supplementary material for: Divergent activities of osteogenic BMP2, and tenogenic BMP12 and BMP13 independent of receptor binding affinities
Source: PubMed Central journal article supplement (PMC3154542; doi:10.3109/08977194.2011.593178), 2011-06-27

10T 1/2

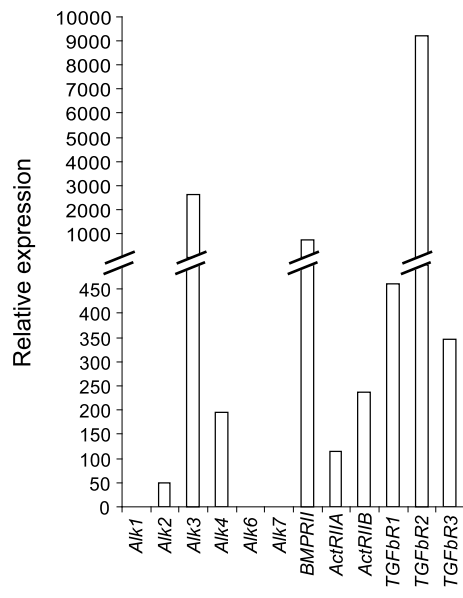

Supplement: SD2.pdf [file SD2.pdf]
